# Supplementary material
Source: PubMed Central journal article supplement (PMC4566222)
Supplement: supp_M115.675595_jbc.M115.675595-1.pdf [file supp_M115.675595_jbc.M115.675595-1.pdf]

Supplemental Table S1. Sequences for oligonucleotides

---

**For expression vector construction**

|           |   |                              |
|-----------|---|------------------------------|
| ETV4 full | F | GAATTCATGGAGCGGAGGATGAAAGGC  |
|           | R | GCGGCCGCTAGTAAGAATATCCACCTCT |
| ETV5 full | F | CTCGAGATGGATGGGTTTTGTGATCAG  |
|           | R | GCGGCCGCTTAGTAAGCGAAGCCTTCGG |

**For reporter plasmid construction**

|                                  |   |                                |
|----------------------------------|---|--------------------------------|
| ETV4 promoter (-2486/-2019)      | F | CTCGAGCTTCAGAGCCAGCTTGCCAG     |
|                                  | R | AGATCTGTGACATTGAAGCATCCAGCC    |
| ETV4 mutated Oct3/4 binding site | F | CTAAAGTCCACGACGTGGGTTTATAATTTA |
|                                  | R | TAAATTATAAACCCACGTCGTGGACTTTAG |
| ETV5 intron 6 region             | F | CTCGAGGAAACCGGAAGCAGAAGCTA     |
|                                  | R | AGATCTACTGGCTTTCAGGCATCATC     |
| ETV5 mutated Oct3/4 binding site | F | TGGTTACTGTGCCGCTGCCTCCCTG      |
|                                  | R | CAGGGAGGCAGCGGCACAGTAACCA      |

**For EMSA assay**

|                                  |   |                           |
|----------------------------------|---|---------------------------|
| ETV5 Oct3/4 binding site         | F | TGGTTACTATGCAAATGCCTCCCTG |
|                                  | R | CAGGGAGGCATTTGCATAGTAACCA |
| ETV5 mutated Oct3/4 binding site | F | TGGTTACTGTGCCGCTGCCTCCCTG |
|                                  | R | CAGGGAGGCAGCGGCACAGTAACCA |

**For biotin-labeled DNA pulldown assay**

|                                  |   |                                |
|----------------------------------|---|--------------------------------|
| ETV4 Oct3/4 binding site         | F | CTAAAGTCCACATTTGCATTTTATAATTTA |
|                                  | R | TAAATTATAAAATGCAAATGTGGACTTTAG |
| ETV4 mutated Oct3/4 binding site | F | CTAAAGTCCACGACGTGGGTTTATAATTTA |
|                                  | R | TAAATTATAAACCCACGTCGTGGACTTTAG |
| Gbx2 ETV4/5 binding site         | F | AGCCAGAGCTCTTCCGGGTGAACTGA     |
|                                  | R | TCAGTTCACCCGGAAGAGCTCTGGCT     |
| Gbx2 mutated ETV4/5 binding site | F | AGCCAGAGTTAGCATTTGTGAACTGA     |
|                                  | R | TCAGTTCACAAATGCTAACTCTGGCT     |

**For expression analysis**

|      |   |                      |
|------|---|----------------------|
| ETV5 | F | AGCCACCATGTATCGAGAG  |
|      | R | TGCATGATGCCCTTTTCATA |
| ETV4 | F | CCACCAGGATCAAGAAGGAA |

|         |   |                          |
|---------|---|--------------------------|
|         | R | CCCTGAGGAGATGTGAAGGA     |
| Gata6   | F | GCGCCTCCTCTCTCCTTTTT     |
|         | R | GCGCTACTCCAACCTGACTT     |
| Fkl1    | F | GGCGGTGGTGACAGTATCTT     |
|         | R | GTCACTGACAGAGGCGATGA     |
| Tbx5    | F | GGACCCAGTCCCTTGAATGG     |
|         | R | TCCAGGCTGAGGAGTTCTAGGC   |
| Sox1    | F | AGGGCCCAAGAGTAAGGAAA     |
|         | R | ACTGAGCACAACCCATCCTC     |
| Pax3    | F | ATAAGCCCAGGACACAGAGTTGTG |
|         | R | GTCTAGTCTGTGGAGGCCGAAAC  |
| p16/p19 | F | AGAGCGGGGACATCAAGAC      |
|         | R | AGAAAAAGGCGGGCTGAG       |
| p15     | F | AAGGACCATTTCTGCCACAG     |
|         | R | TCGTGCACAGGTCTGGTAAG     |
| p57     | F | GTACCTCCGCAGCAGAACAG     |
|         | R | ACAGACTCGCTGTCCACCTC     |
| Tcf15   | F | CAGCTGCTTGAAAGTGAGGG     |
|         | R | TCCTCCGGTCCTTACACAAC     |
| Gbx2    | F | AGACGGCAAAGCCTTCTTG      |
|         | R | AGCAGTCTGACCAGGCAAAT     |
| LRH1    | F | GAGCAGAGTAACCGAAACAGG    |
|         | R | TGAACAGCACCAGGAACTTG     |
| Zic3    | F | CCATGCATGAGTTGGTTACG     |
|         | R | TATAGGGCTTGTCCGAGGTG     |
| Baf60c  | F | GGACCCATCAGACCAGAAGA     |
|         | R | TGCCACATCTGTCATCACCT     |

---

Supplemental Table S2. Pathway analysis

---

MAPP Name

---

PE 15-2/PE 9 (ratio > 2.0)

- 1 Mm\_Striated\_Muscle\_Contraction\_WP216\_33380
- 2 Mm\_Prostaglandin\_Synthesis\_and\_Regulation\_WP374\_33046
- 3 Mm\_Statin\_Pathway(PharmGKB)\_WP1\_35542
- 4 Mm\_Regulation\_of\_Actin\_Cytoskeleton\_WP523\_34401
- 5 Mm\_Myometrial\_Relaxation\_and\_Contraction\_Pathways\_WP385\_35258
- 6 Mm\_Hypertrophy\_Model\_WP202\_32968
- 7 Mm\_EGFR1\_Signaling\_Pathway\_WP572\_35717
- 8 Mm\_Methane\_metabolism
- 9 Mm\_O\_Glycans\_biosynthesis
- 10 Mm\_Focal\_Adhesion\_WP85\_35638
- 11 Mm\_Glycerolipid\_metabolism
- 12 Mm\_Ovarian\_Infertility\_Genes\_WP273\_32715

PE 15-2/PE 9 (ratio > 0.5)

- 1 Mm\_Cytoplasmic\_Ribosomal\_Proteins\_WP163\_34552
  - 2 Mm\_Nitrogen\_metabolism
  - 3 Mm\_Phenylalanine\_tyrosine\_and\_tryptophan\_biosynthesis
  - 4 Mm\_Non-homologous\_end\_joining\_WP1242\_35403
  - 5 Mm\_Proteasome\_Degradation\_WP519\_33047
  - 6 Mm\_Glutathione\_metabolism
  - 7 Mm\_Glycine\_serine\_and\_threonine\_metabolism
  - 8 Mm\_Thiamine\_metabolism
  - 9 Mm\_Polyol\_pathway\_WP1265\_32726
-
